# Supplementary material
Source: HighWire-hosted journal article supplement (https://jitc.bmj.com/content/9/9/e002472)
Supplement: inline-supplementary-material-1 [file inline-supplementary-material-1.xlsx]

## Sheet: S1) Sample overview
Table S1: Overview samples per patient
											Luminex cytokine quantification		Tumor flow cytometry				Gene expression analysis (NanoString)
Subject ID	BOR	SD or PR confirmed?	Confirmed SD or any PR	Histology	MMR	HER2	PD-L1 CPS	PD-L1 CPS: archival months before trial	TMB	Grade 3 or 4 Aes	Baseline	C2 (or C3)	Baseline	Panels	Day 56/EOT	PBMC flow cytometry	Diagnostic	Baseline	Day 56
1	PD	NA	No	EAC	Unknown	Amp	<1		X		X	C2	X	T cell & myeloid		X	X	X
2	PD	NA	No	EAC	Unknown	Amp	<1				X		X	T cell		X
3	SD	Not confirmed	No	EAC	Unknown	Not amp	10-100*	6.80082	X		X	C2	X	T cell		X
4	PD	NA	No	EAC	Unknown	Not amp	10-100				X	C2	X	T cell		X		X
5	PR	Confirmed	Yes	ESCC	Unknown	Unknown	Missing		X	X	X	C2	X	T cell		X
6	PR	Confirmed	Yes	EAC	Unknown	Not amp	Missing		X		X	C2	X	T cell		X
7	PD	NA	No	EAC	Unknown	Not amp	Missing				X	C2	X	T cell & myeloid		X
8	SD	Confirmed	Yes	EAC	Unknown	Not amp	<1		X		X	C2	X	T cell		X
9	PD	NA	No	EAC	Unknown	Amp	<1									X
10	PD	NA	No	EAC	Unknown	Not amp	<1		X		X		X	T cell & myeloid		X
11	PD	NA	No	EAC	Unknown	Not amp	<1		X		X	C2	X	T cell		X		X
12	PD	NA	No	EAC	Unknown	Not amp	<1		X		X	C2	X	T cell		X	X	X
13	SD	Confirmed	Yes	EAC	Unknown	Not amp	<1				X	C3	X	T cell		X
14	PD	NA	No	EAC	MLH1 proficient, not tested otherwise	Not amp	<1		X		X	C2	X	T cell & myeloid		X		X
15	PD	NA	No	EAC	Unknown	Not amp	<1			X	X	C2	X	T cell		X
16	PR	Confirmed	Yes	EAC	Stable	Not amp	1-10				X	C2	X	T cell		X		X
17	PD	NA	No	EAC	Unknown	Amp	10-100*	6.14374	X		X	C2	X	T cell & myeloid		X
18	PD	NA	No	EAC	Unknown	Not amp	Missing		X				X	T cell
19	SD	No confirmation scan	No	EAC	Unknown	Not amp	1-10			X	X	C2	X	T cell & myeloid		X
20	SD	No confirmation scan	No	EAC	Unknown	Not amp	<1		X		X	C2	X	T cell & myeloid		X
21	PD	NA	No	EAC	Unknown	Not amp	<1		X		X	C2	X	T cell & myeloid		X	X	X
22	PD	NA	No	EAC	Stable	Not amp	<1		X		X	C2	X	T cell & myeloid		X
23	PD	NA	No	EAC	Unknown	Not amp	<1		X		X	C2	X	T cell & myeloid		X		X
24	PD	NA	No	EAC	Unknown	Not amp	10-100		X		X	C2	X	T cell & myeloid		X		X
25	PD	NA	No	EAC	Unknown	Not amp	Missing				X	C2	X	T cell & myeloid		X
26	SD	No confirmation scan	No	EAC	Stable	Not amp	<1		X		X	C2	X	T cell & myeloid		X	X	X
27	PD	NA	No	EAC	Unknown	Not amp	<1				X	C2	X	T cell & myeloid		X	X	X
28	PD	NA	No	EAC	Unknown	Not amp	<1		X		X	C2				X	X	X
29	PD	NA	No	EAC	Unknown	Not amp	1-10		X		X	C2	X	T cell & myeloid	Day 56	X	X	X	X
30	PD	NA	No	EAC	Unknown	Amp	<1				X		X	T cell & myeloid		X
31	PD	NA	No	ESCC	Stable	Unknown	<1		X		X	C3				X	X	X
32	PD	NA	No	EAC	Stable	Not amp	<1		X		X	C2				X
33	PD	NA	No	ESCC	Stable	Not amp	10-100		X		X	C2	X	T cell & myeloid		X
34	PR	Not confirmed	Yes	EAC	Deficient	Not amp	1-10		X		X	C2	X	T cell & myeloid	EOT	X	X	X
35	PD	NA	No	EAC	Unknown	Amp	<1				X	C2				X		X
36	PD	NA	No	EAC	Unknown	Amp	1-10				X	C2	X	T cell & myeloid	Day 56	X		X	X
37	SD	Confirmed	Yes	ESCC	Unknown	Unknown	Missing				X	C3	X	T cell & myeloid		X
38	PD	NA	No	ESCC	Unknown	Unknown	Missing			X	X	C2	X	T cell & myeloid		X		X
39	SD	No confirmation scan	No	EAC	Unknown	Amp	Missing					C2	X	T cell & myeloid	Day 56
40	SD	Confirmed	Yes	EAC	Unknown	Not amp	1-10		X		X	C2	X	T cell & myeloid	Day 56	X		X	X
41	PD	NA	No	EAC	Unknown	Amp	<1*	30.5216			X	C2	X	T cell & myeloid		X
42	PD	NA	No	EAC	Unknown	Not amp	1-10				X					X		X
43	PD	NA	No	EAC	Unknown	Unknown	<1				X	C2				X		X
44	PD	NA	No	ESCC	Unknown	Not amp	10-100				X	C2				X
45	excluded	NA	No	excluded
46	PD	NA	No	EAC	Unknown	Not amp	<1				X	C2	X	T cell & myeloid		X
47	SD	Not confirmed	No	ESCC	Stable	Unknown	<1		X		X	C2				X
48	PD	NA	No	ESCC	Unknown	Unknown	1-10				X	C3				X
49	excluded	NA	No	excluded
50	PD	NA	No	ESCC	Stable	Unknown	<1*	11.9261	X	X						X
51	SD	Confirmed	Yes	ESCC	Stable	Not amp	10-100*	4.27105	X	X						X
							*archival

## Sheet: S2) Tumor Flow Ab specs
Table S2: Tumor flow cytometry antibody details
Antibody	Clone	Vendor
CD3	UCHT1	Biolegend
CD4	RPA-T4	Biolegend
CD8	RPA-T8	Biolegend
CD14	M5E2	Biolegend
CD15	W6D3	Biolegend
CD16	3G8	Biolegend
CD19	HIB19	Biolegend
CD33	WM53	Biolegend
CD38	HIT2	Biolegend
CD45	HI30	Biolegend
CD45RA	HI100	Biolegend
CD45RO	UCHL1	Biolegend
CD56	B159	Biolegend
CD69	FN50	Biolegend
HLA-DR	G46-6	Biolegend
PD-1	EH12.1	Biolegend
CTLA-4	L3D10	Biolegend
PD-L1	29E.2A3	Biolegend
PD-L2	24F.10C12	Biolegend
TIM-3	F38-2E2	Biolegend
CD123	6H6	Biolegend
CCR7	150503	Thermo Fisher Scientific

## Sheet: S3) PBMC Flow Ab specs
Table S3: PBMC flow cytometry antibody details
Antibody	Clone	Vendor
CD3	UCHT1	eBio
CD3	OKT3	eBio
CD4	OKT4	eBio
CD8	BW135/80	Miltenyi
CD8	RPA-T8	BD
CD14	MOP9	BD
CD19	SJ25c1	eBio
CD25	BC96	eBio
CD56	HCD56	Biolegend
CD69	FN50	eBio
CD71	M-A712	BD
CD127	eBioRDR5	eBio
PD-1	EBIOJ105	eBio
TIM3	F382E2	Biolegend
LAG3	11c3c65	Biolegend
HLA-DR	L243	Biolegend
PDL-1	MIH1	BD
CD45RA	HI100	eBio
CCR7	GO43H7	Biolegend
Live/Dead

## Sheet: S4) AEs
Table S4: Adverse events
	All Grades	Grades 3-4
Fatigue	27 (55%)	0
Dyspnea	8 (16%)	1 (2%)
Rash	7 (14%)	0
Anorexia	6 (12%)	0
Arthralgia	5 (10%)	1 (2%)
Pruritus	5 (10%)	1 (2%)
Alkaline phosphatase increased	4 (8%)	0
Cough	4 (8%)	0
Diarrhea	4 (8%)	0
Aspartate aminotransferase increased	3 (6%)	1 (2%)
Hyperglycemia	3 (6%)	0
Abdominal pain	2 (4%)	0
Alanine aminotransferase increased	2 (4%)	0
Back pain	2 (4%)	0
Hyperhidrosis	2 (4%)	0
Hyponatremia	2 (4%)	0
Myalgia	2 (4%)	1 (2%)
Nausea	2 (4%)	0
Pneumonitis	2 (4%)	2 (4%)
Ptosis	2 (4%)	0
Ataxia	1 (2%)	0
Bone pain	1 (2%)	0
Cardiac arrest	1 (2%)	1 (2%)
Diaphoresis	1 (2%)	0
Dizziness	1 (2%)	0
Dry mouth	1 (2%)	0
Dry skin	1 (2%)	0
Duodenal hemorrhage	1 (2%)	1 (2%)
Dysphagia	1 (2%)	1 (2%)
Esophageal perforation (microperforation)	1 (2%)	0
Fever	1 (2%)	0
Generalized muscle weakness	1 (2%)	0
Generalized pain	1 (2%)	1 (2%)
Hyperthyroidism	1 (2%)	0
Hypoxia	1 (2%)	1 (2%)
Internuclear ophthalmoplegia	1 (2%)	1 (2%)
Myasthenia gravis	1 (2%)	1 (2%)
Neutrophil count decreased	1 (2%)	0
Pain in extremity	1 (2%)	0
Pancreatitis	1 (2%)	0
Pleural effusion	1 (2%)	0
Respiratory failure	1 (2%)	1 (2%)
Weight gain	1 (2%)	0
Wheezing	1 (2%)	0

## Sheet: S5) Flow_BOR
Table S5: Statistics of associations between flow cytometry and radiologic response
				EAC and ESCC
Parent	Cell population	Marker	Threshold parent	Overall		Responders		Non-responders		W	r	P-value	Normality test conclusion	P-value	P-value	P-value	P-value	P-value		PD-L1 neg		PD-L1 pos		W	r	P-value_1	P-value_2	P-value		EAC		ESCC		W	r	P-value_1	P-value_2
				n	median % of parent	n	median % of parent	n	median % of parent			Shapiro-Wilk		Wilcoxon rank sum	t test	lin regr	lin regr location	lin regr location + hist		n	median % of parent	n	median % of parent			Wilcoxon rank sum	Wilcoxon rank sum	lin regr location + hist		n	median % of parent	n	median % of parent				Wilcoxon rank sum
CD45+	T cells (CD3+)	CD3+	>100	36	19.64	13	7.5	24	28.36			0.306	Not normal	ns	NA	ns	ns	ns								ns	0.5604			33	24.94	4	15.86			ns	0.4069
	Myeloid cells (CD33+)	CD33+	>100	36	53.96	13	77.68	24	45.68			0.9727	Normal	NA	ns	ns	ns	ns								ns	0.6663			33	50.92	4	67.175			ns	0.316
	Granulocytes (CD15+)	CD15+	>100	25	41.52	7	81.92	18	31.81	70.05		0.5199	Normal	NA	<0.0001	3.2e-05	0.00109	0.001408								ns	0.5962			22	40.61	3	64.19			ns	0.5504
	B cells (CD19+)	CD19+	>100	25	1.03	7	1.27	18	0.16			<0.0001	Not normal	0.0328	NA	ns	0.0386	0.0269								ns	0.5865			22	0.93	3	1.16			ns	0.9
	NK T cells (CD3+ CD56+)	CD3+ CD56+ (?)	>100	25	0.54	7	0.25	18	2.205			<0.0001	Not normal	0.0209	NA	ns	ns	ns								ns	0.5861			22	0.585	3	0.48			ns	0.6449
	NK cells (CD56+)	CD56+	>100	25	1.79	7	0.32	18	3.69			0.0004	Not normal	0.0014	NA	0.0397	ns	ns								ns	0.9298			22	1.805	3	1.02			ns	0.5305
	Monocytes (CD14+)	CD14+	>100	25	5.53	7	2.99	18	5.735			<0.0001	Not normal	ns	NA	ns	ns	ns								ns	0.536			22	5.095	3	6.99			ns	1
CD3+	CD4+ T cells		>100	24	50.25	9	42.7	15	50.6			0.5344	Normal	NA	ns	ns	ns	ns		10	47.5	6	57.25			ns	0.4278				50.4	3	42.7			ns	0.8696
	CD8+ T cells		>100	24	36.8	9	39.7	15	34.3			0.5455	Normal	NA	ns	ns	ns	ns		10	38.2	6	25.25	46	-0.417098	0.09341	0.09341	ns			36.7	3	43.6			ns	0.5049
CD4+	PD-1+		>100	18	31.71	8	22.72	10	43.59			0.2348	Normal	NA	ns	ns	0.0349	NA (only EAC)			34.82		18.17			ns	0.3636					0				NA	NA
	TIM-3+		>100	18	13.6	8	10.69	10	17.04			0.0792	Normal	NA	ns						11.77		10.19			ns	0.7972					0				NA	NA
	CTLA-4+		>100	18	10.4	8	11.46	10	10.4			<0.0001	Not normal	ns	NA						8.7		4.96			ns	0.4376					0				NA	NA
	CD38+		>100	18	54.94	8	40.9	10	63.15			0.3918	Normal	NA	0.0444	0.0444	0.0918	NA (only EAC)			55		35.89			ns	0.5185					0				NA	NA
	CD69+		>100	18	46.49	8	41.53	10	48			0.4734	Normal	NA	ns						47.2		29.74			ns	0.2398					0				NA	NA
	PD-1+ / TIM-3 +		>100	18	10.34	8	7.26	10	11.95			0.1716	Normal	ns	ns																	0				NA	NA
	PD-1+ / TIM-3 -		>100	18	21.55	8	14.85	10	24.4			0.1147	Normal	NA	ns																	0				NA	NA
	PD-1- / TIM-3 +		>100	18	4.235	8	3.82	10	4.235			0.0381	Not normal	ns	ns																	0				NA	NA
	PD-1- / TIM-3 -		>100	18	46.49	8	41.53	10	48			0.4734	Normal	NA	ns																	0				NA	NA
	PD-1+ / CTLA-4 +		>100	18	5.055	8	4.805	10	6.165			<0.0001	Not normal	ns	NA																	0				NA	NA
	PD-1+ / CTLA-4 -		>100	18	22.1	8	16.15	10	27			0.1285	Normal	ns	ns																	0				NA	NA
	PD-1 - / CTLA-4 +		>100	18	4.53	8	4.57	10	2.76			<0.0001	Not normal	ns	NA																	0				NA	NA
	PD-1 - / CTLA-4 -		>100	18	61.55	8	71.8	10	56.4			0.0916	Normal	NA	ns																	0				NA	NA
	CD45RA+ / CCR7+ (naïve)		>100	18	1.725	8	2.035	10	1.435			0.0171	Not normal	ns	NA																	0				NA	NA
	CD45RO+ / CCR7+ (CM)		>100	18	4.325	8	3.805	10	10.6			0.0128	Not normal	ns	NA																	0				NA	NA
	CD45RA+ / CCR7- (EMRA)		>100	18	6.155	8	5.79	10	6.745			0.2149	Normal	NA	ns																	0				NA	NA
	CD45RO+ / CCR7- (EM)		>100	18	5.055	8	4.805	10	6.165			<0.0001	Not normal	ns	NA																	0				NA	NA
CD8+	PD-1+		>100	15	22.2	5	18.08	10	30.75			0.0974	Normal	NA	ns							3				ns	1					0				NA	NA
	TIM-3+		>100	15	15.93	5	15.93	10	18.43			0.0336	Not normal	ns	ns							3				ns	0.3727					0				NA	NA
	CTLA-4+		>100	15	3.16	5	5.6	10	2.605			0.002	Not normal	ns	NA							3				ns	0.6					0				NA	NA
	CD38+		>100	15	76.8	5	80.3	10	74.4			0.0844	Normal	NA	ns							3				ns	0.3727					0				NA	NA
	CD69+		>100	15	72.62	5	77.45	10	67.59			0.0932	Normal	NA	ns							3				ns	0.3727					0				NA	NA
	PD-1+ / TIM-3 +		>100	15	11.9	5	10.6	10	14.85			0.0159	Not normal	ns	NA																	0				NA	NA
	PD-1+ / TIM-3 -		>100	15	9.47	5	7.87	10	10.75			0.444	Normal	NA	ns																	0				NA	NA
	PD-1- / TIM-3 +		>100	15	4.29	5	4.12	10	4.71			0.0082	Not normal	ns	NA																	0				NA	NA
	PD-1- / TIM-3 -		>100	15	73	5	74	10	62.4			0.2193	Normal	NA	ns																	0				NA	NA
	PD-1+ / CTLA-4 +		>100	15	0.79	5	0.75	10	0.875					ns																		0				NA	NA
	PD-1+ / CTLA-4 -		>100	15	22	5	16.9	10	29.3					ns																		0				NA	NA
	PD-1 - / CTLA-4 +		>100	15	1.55	5	5.12	10	0.94					ns																		0				NA	NA
	PD-1 - / CTLA-4 -		>100	15	77.1	5	77.2	10	68.9					ns																		0				NA	NA
	CD45RA+ / CCR7+ (naïve)		>100	15	10.1	5	6.54	10	12.6			0.4476	Normal	NA	0.0877	0.0877	0.0826	NA (only EAC)														0				NA	NA
	CD45RO+ / CCR7+ (CM)		>100	15	8.55	5	1.88	10	10.01			0.0538	Normal	0.0992	ns	ns	ns	ns														0				NA	NA
	CD45RA+ / CCR7- (EMRA)		>100	15	88.2	5	93.5	10	86.75			0.3313	Normal	NA	0.0938	0.0938	ns	ns														0				NA	NA
	CD45RO+ / CCR7- (EM)		>100	15	91.5	5	98.1	10	89.95			0.0764	Normal	NA	ns	ns	ns	ns														0				NA	NA
CD15+	Neutrophils		>100	17	93.1	7	95.4	10	92			<0.0001	Not normal	ns	NA						90.9	4	90.5			ns	0.9399			15	90.9	2	97.8	3	-0.41347	0.08824	0.08824
	Eosinophils		>100	17	2.09	7	2.02	10	2.18			<0.0001	Not normal	ns	NA						2.27	4	6.06			ns	0.6042			15	2.19	2	1.365			ns	0.2941
	gMDSCs		>100	17	97.7	7	99	10	93.35			0.0004	Not normal	0.0171	NA						97.3	4	98.5			ns	0.2794			15	97.6	2	99.6	0	-0.524892	0.03045	0.03045
Monocytes	HLA-DR-		>50	10		3	72.8	7	69.7					ns												ns	0.8571					0				NA
	HLA-DR+		>50	10		3	27.2	7	30.3					ns												ns	0.8571					0				NA
Parent	Cell population	Marker	Threshold parent	Overall		Responders		Non-responders		W	r			P-value	P-value	P-value	P-value	P-value		PD-L1 neg		PD-L1 pos		W	r	P-value_1	P-value_2			EAC		ESCC		W	r	P-value_1	P-value_2
				n	median MFI	n	median MFI	n	median MFI					Wilcoxon rank sum	t test	lin regr	lin regr location	lin regr location + hist
Monocytes	PD-L1		>50	10	1147	3	1064	7	1230			0.09244	Normal	ns								2				ns	0.5714					0				NA	NA
	PD-L2		>50	10	536	3	473	7	568			0.2359	Normal	ns								2				ns	0.8571					0				NA	NA
	CD163		>50	10	427.5	3	194	7	570			0.6038	Normal	0.0667								2				ns	0.1905					0				NA	NA
	CD16		>50	10	889	3	686	7	1110			0.1526	Normal	ns							1265	2	670	10	-0.481623	0.09524	0.09524	ns				0				NA	NA
	CD83		>50	10	594.5	3	392	7	697			3.297e-06	Not normal	ns								2				ns	0.381					0				NA	NA

## Sheet: S6) Luminex timepoints per pt
Table S6: Luminex circulating chemokine/cytokine analysis: Overview timepoints per patient
Subject ID	BOR	C1D1	C2D1	C3D1	C4D1	C5D1	C6D1	C7D1	EOT
1	PD	X	X	X							X	= blood sample analyzed
2	missing	X										= blood sample not analyzed
3	SD	X	X	X
4	PD	X	X		X
5	SD	X	X		X
6	SD	X	X		X
7	PD	X	X						X
8	SD	X	X					X
9	PD
10	PD	X
11	PD	X	X		X
12	PD	X	X					X
13	SD	X		X		X
14	PD	X	X						X
15	PD	X	X			X
16	PR	X	X				X
17	PD	X	X						X
18	PD
19	SD	X	X	X
20	SD	X	X		X
21	PD	X	X	X
22	PD	X	X						X
23	PD	X	X	X
24	PD	X	X
25	PD	X	X						X
26	SD	X	X
27	PD	X	X						X
28	PD	X	X						X
29	PD	X	X						X
30	PD	X
31	PD	X		X
32	PD	X	X	X
33	PD	X	X		X
34	PR	X	X		X
35	PD	X	X	X
36	PD	X	X						X
37	SD	X		X			X
38	PD	X	X	X
39	SD		X	X	X
40	SD	X	X					X
41	PD	X	X
42	PD	X
43	PD	X	X
44	PD	X	X	X
45	excluded
46	PD	X	X						X
47	SD	X	X	X
48	PD	X		X					X
49	excluded
50	PD
51	SD

## Sheet: S7) Correlation Luminex PBMCs
Table S7: Correlation between circulating chemokines/cytokines and PBMCs at baseline
Pearson's R Correlation Coefficient
	Live_Monocytes_FoTotal	CD14_HLA_DR_FoMonos	Live_lymphocytes	CD3_FoP	CD4_FoP	CD8_FoP	CD4_HLA_DR_FoP	CD4_LAG3_FoP	CD4_PD1_FoP	CD4_PDL1_FoP	CD4_TIM3_FoP	CD8_HLA_DR_FoP	CD8_LAG3_FoP	CD8_PD1_FoP	CD8_PDL1_FoP	CD8_TIM3_FoP	CD4_CD69_FoP	CD4_CD71_FoP	CD4_Naive_FoP	CD4_TCM_FoP	CD4_TEM_FoP	CD4_TEMRA_FoP	CD8_CD69_FoP	CD8_CD71_FoP	CD8_Naive_FoP	CD8_TCM_FoP	CD8_TEM_FoP	CD8_TEMRA_FoP	CD19_B_cells_FoP	CD56_NK_FoP	NKT_cells_FoLive	CD8_pos_NKT_cells_FoP	Tregs_FoCD4	Tregs_FoLiveLymphs
log(IL6)	0.234191	0.315169	-0.189241	-0.219106	0.118956	-0.154054	-0.220908	0.155439	-0.092093	0.22626	0.408878	-0.202019	0.0405406	-0.0480111	0.331061	0.324716	0.107894	-0.208144	0.018558	0.096888	-0.213869	0.12748	0.0913196	-0.00304956	0.0936499	0.122376	-0.170334	0.00589544	0.139614	-0.118635	0.185248	-0.320572	-0.0614594	-0.146548
log(CCL2)	0.106145	-0.0456026	0.07227	-0.0112281	0.0988882	-0.116809	0.0392021	0.0905353	0.121339	0.0032727	0.0314752	-0.038401	-0.206242	0.0446671	0.0611386	0.0131072	-0.143139	0.229003	-0.286712	-0.0141828	0.336643	-0.0404722	-0.174719	0.0979599	-0.190012	0.138044	0.307458	-0.114276	0.324747	0.0817235	-0.102993	0.0825878	0.238617	0.246718
log(IL7)	0.0683562	0.0303083	-0.171549	-0.302489	0.157909	-0.15439	0.244154	0.0574142	0.242002	0.214398	0.214064	0.152085	-0.0559374	0.176194	0.188547	0.102658	-0.160163	0.270167	-0.405012	0.146215	0.233762	0.0317949	-0.207867	0.209473	-0.0479416	0.0848387	0.245104	-0.15082	0.119625	0.192236	0.0553406	-0.338918	0.148966	-0.0305267
log(IL1RA)	-0.219687	0.117412	-0.224905	-0.0501942	-0.144801	0.0825653	-0.00676159	0.216482	-0.00298458	-0.157727	0.0400579	0.0151701	0.180954	-0.116581	-0.0829846	0.00668175	0.0323119	-0.0729988	-0.199297	0.0374652	0.102134	0.0858438	-0.0862974	0.0264112	0.0889235	0.128855	0.290303	-0.283359	-0.0685666	-0.127665	0.278918	-0.242752	-0.125196	-0.225729
log(IL2RA)	-0.0207908	0.291735	-0.160801	-0.104565	0.0861856	-0.011954	-0.0883063	-0.0412843	-0.0170907	-0.119393	0.0478693	-0.0528025	-0.0655205	-0.0461409	-0.0522887	-0.0139628	0.208314	0.173846	0.161457	0.00925045	-0.18017	0.00641025	0.124897	0.324054	0.268927	0.19149	-0.0376552	-0.217206	-0.0206004	-0.202158	-0.0176483	-0.116444	0.0687038	0.0199402
log(CXCL8)	-0.137471	0.0269836	-0.151779	0.00741194	-0.163949	0.0801022	-0.240452	0.19534	0.00662695	0.0279469	0.0443289	-0.172131	0.0815187	0.0110246	-0.00766493	0.0567704	0.0612777	-0.155156	-0.0609152	-0.0570241	-0.0153005	0.193571	0.0258846	-0.0675989	-0.0203053	0.0369644	0.0626297	-0.0379723	-0.198894	0.00474908	0.411086	-0.115656	-0.205139	-0.222516
log(CXCL6)	0.0539992	-0.00452323	0.162048	0.0591949	-0.191942	0.13171	-0.056218	-0.223782	0.0122133	0.0986759	-0.0192827	-0.0622981	-0.156713	0.0534869	0.161905	0.107735	-0.239085	-0.14295	-0.065531	-0.235648	0.132023	0.260974	-0.169411	-0.223313	-0.40415	-0.286343	-0.116274	0.434635	-0.329044	0.0986338	0.349248	0.131312	0.0496585	-0.000920241
log(IL10)	0.0300269	-0.111976	0.0595417	0.122543	0.0153168	-0.0528746	0.0773868	-0.145338	0.176085	-0.202069	-0.146418	-0.00327084	0.0492086	0.192672	-0.247654	-0.163547	-0.484338	-0.0913986	-0.0995399	-0.215796	0.251129	0.106966	-0.414008	-0.168094	-0.253355	-0.166161	0.168833	0.0960203	0.250563	0.068302	0.158144	-0.0197596	0.0120997	0.10383
log(CXCL2)	-0.250472	0.154666	-0.129401	-0.0590983	-0.212247	0.176339	0.0620838	0.0750715	0.196164	0.233914	0.182922	0.0205408	0.100822	0.172353	0.268459	0.208692	0.0992439	-0.132025	-0.140509	-0.114454	0.161144	0.145938	0.0224892	-0.181756	-0.146714	-0.228758	0.054724	0.139117	-0.346023	0.0214595	0.285337	-0.143495	-0.132745	-0.267645
log(CSF2)	-0.121472	-0.206501	0.185019	0.173202	-0.1074	0.100244	0.323121	-0.359896	0.0766766	-0.29411	-0.253899	0.336237	-0.0771659	-0.0411107	-0.312546	-0.213186	-0.4268	-0.115408	0.14952	-0.507592	0.202849	0.2103	-0.360894	-0.0610043	-0.331619	-0.4207	-0.0121783	0.333142	0.0320723	-0.181758	0.15897	0.0418593	-0.16801	-0.0877664
log(CXCL5)	-0.100565	-0.116655	0.00526001	0.0852168	-0.167915	0.107481	0.105708	-0.0376625	0.171247	0.216549	0.0188336	0.113048	-0.0412785	0.202518	0.215185	0.0441785	-0.0668803	0.0309723	-0.288939	0.00823056	0.242487	0.0605122	-0.0862804	-0.080469	-0.218053	-0.136984	0.273576	0.0182944	-0.290553	0.145264	0.254076	0.0642039	0.0923738	0.0557026
log(CXCL10)	-0.0448177	-0.271621	0.296965	0.0954705	-0.163713	0.130004	0.0322391	-0.202732	0.0780113	-0.115515	-0.203049	0.144682	-0.162026	0.065036	-0.154288	-0.133326	-0.508049	-0.157213	-0.0800648	-0.322088	0.273739	0.211422	-0.434562	-0.160548	-0.464618	-0.236182	0.184649	0.268426	0.0404271	0.111861	0.259761	0.217177	-0.226791	-0.219769
P-value
	Live_Monocytes_FoTotal	CD14_HLA_DR_FoMonos	Live_lymphocytes	CD3_FoP	CD4_FoP	CD8_FoP	CD4_HLA_DR_FoP	CD4_LAG3_FoP	CD4_PD1_FoP	CD4_PDL1_FoP	CD4_TIM3_FoP	CD8_HLA_DR_FoP	CD8_LAG3_FoP	CD8_PD1_FoP	CD8_PDL1_FoP	CD8_TIM3_FoP	CD4_CD69_FoP	CD4_CD71_FoP	CD4_Naive_FoP	CD4_TCM_FoP	CD4_TEM_FoP	CD4_TEMRA_FoP	CD8_CD69_FoP	CD8_CD71_FoP	CD8_Naive_FoP	CD8_TCM_FoP	CD8_TEM_FoP	CD8_TEMRA_FoP	CD19_B_cells_FoP	CD56_NK_FoP	NKT_cells_FoLive	CD8_pos_NKT_cells_FoP	Tregs_FoCD4	Tregs_FoLiveLymphs
log(IL6)	0.135496	0.0420495	0.230025	0.16328	0.453058	0.330014	0.15976	0.325631	0.561878	0.14963	0.00717725	0.199492	0.798793	0.762704	0.0322281	0.0358947	0.496428	0.185915	0.907137	0.5416	0.173832	0.421094	0.565181	0.984708	0.555255	0.440076	0.280818	0.970442	0.377871	0.454286	0.240191	0.0384688	0.699017	0.354398
log(CCL2)	0.492865	0.768805	0.641076	0.942334	0.52306	0.450183	0.80054	0.558913	0.432684	0.983179	0.839274	0.804536	0.179218	0.773422	0.693403	0.932704	0.353963	0.134847	0.0591728	0.927195	0.0254559	0.794216	0.256652	0.526988	0.216679	0.371531	0.042336	0.460135	0.0314933	0.597937	0.50587	0.594057	0.118792	0.10642
log(IL7)	0.659295	0.845159	0.265517	0.045961	0.305959	0.316999	0.110224	0.711245	0.113496	0.162255	0.162926	0.324366	0.718363	0.252595	0.220309	0.507264	0.29902	0.0761231	0.00638831	0.343606	0.126708	0.837663	0.175741	0.172353	0.757298	0.584005	0.108803	0.328456	0.43926	0.21125	0.721246	0.0244188	0.334503	0.844056
log(IL1RA)	0.151898	0.447832	0.142164	0.746264	0.348346	0.594158	0.965255	0.158115	0.98466	0.306525	0.796277	0.922142	0.239797	0.451075	0.592279	0.965665	0.835059	0.637706	0.194636	0.809209	0.509442	0.579541	0.577532	0.86487	0.565961	0.404503	0.0559266	0.0623376	0.65831	0.408892	0.0667365	0.112348	0.418087	0.140669
log(IL2RA)	0.893438	0.0546723	0.297072	0.499361	0.578027	0.938612	0.568671	0.790178	0.912321	0.440157	0.757653	0.73355	0.672619	0.766152	0.736049	0.928322	0.174794	0.259074	0.295081	0.952478	0.241875	0.967059	0.419211	0.0318786	0.0775326	0.213061	0.80826	0.156694	0.894409	0.188175	0.909472	0.451613	0.657669	0.897775
log(CXCL8)	0.373539	0.86197	0.325353	0.961915	0.287591	0.605244	0.115898	0.203829	0.965946	0.857092	0.775092	0.263875	0.598858	0.943377	0.960616	0.714345	0.692739	0.314577	0.694468	0.713123	0.921475	0.208034	0.86754	0.662843	0.895913	0.811713	0.686304	0.806676	0.195558	0.975592	0.00557044	0.454698	0.181607	0.146562
log(CXCL6)	0.727741	0.976753	0.293293	0.702694	0.211962	0.394082	0.717008	0.144219	0.937284	0.523957	0.901128	0.687881	0.309683	0.730226	0.293723	0.486374	0.118049	0.354606	0.672569	0.123588	0.39295	0.0870693	0.271609	0.145084	0.00651254	0.0595145	0.452274	0.00319704	0.0291884	0.524136	0.0201438	0.395528	0.748883	0.99527
log(IL10)	0.857973	0.503292	0.722519	0.463593	0.927278	0.752554	0.644223	0.383956	0.290286	0.223747	0.380393	0.984451	0.769227	0.246484	0.133845	0.326532	0.00206108	0.585243	0.552119	0.193186	0.1283	0.522697	0.00976718	0.313076	0.124838	0.318754	0.310924	0.566331	0.129192	0.683675	0.342986	0.906267	0.942524	0.535026
log(CXCL2)	0.101032	0.316125	0.402499	0.703157	0.166612	0.252198	0.6889	0.628161	0.20189	0.126455	0.234637	0.894713	0.514928	0.263249	0.0780706	0.173995	0.521559	0.392942	0.362968	0.459434	0.296029	0.344532	0.88479	0.237686	0.341946	0.135277	0.724229	0.367789	0.021405	0.890032	0.0604549	0.352756	0.390345	0.0790122
log(CSF2)	0.500694	0.248911	0.302633	0.335089	0.551909	0.578855	0.0666289	0.0396633	0.671482	0.0966403	0.15393	0.055725	0.669503	0.820305	0.0765809	0.233577	0.0132484	0.522465	0.40626	0.00256745	0.257564	0.240118	0.0390785	0.735932	0.0593897	0.0147731	0.946372	0.0581612	0.859365	0.311384	0.376892	0.817087	0.349997	0.627195
log(CXCL5)	0.516005	0.450786	0.972967	0.582324	0.275927	0.487408	0.494658	0.808223	0.266372	0.157982	0.90342	0.465001	0.790207	0.187373	0.160683	0.775836	0.666217	0.841809	0.0571422	0.957712	0.112752	0.696392	0.577607	0.603588	0.155045	0.37525	0.0723497	0.906173	0.0557058	0.346787	0.0960587	0.678839	0.550924	0.719497
log(CXCL10)	0.772678	0.0744954	0.0502838	0.537591	0.288294	0.40029	0.835426	0.186898	0.614726	0.455253	0.186194	0.348745	0.293359	0.674905	0.317325	0.388256	0.000430523	0.308123	0.605414	0.0329929	0.0721738	0.168304	0.00320281	0.297843	0.00148658	0.122713	0.230174	0.0781087	0.79444	0.469734	0.0886004	0.156751	0.13876	0.151742
	Legend
	Pearson's R Correlation Coefficient
	If corresponding P-value < 0.1
	-1	-1
	-0.9
	-0.8
	-0.7
	-0.6
	-0.5
	-0.4
	-0.3
	-0.2
	-0.1
	0
	0.1
	0.2
	0.3
	0.4
	0.5
	0.6	1
	0.7
	0.8
	0.9
	1
	If corresponding P-value < 0.05
	If corresponding P-value > 0.1; no fill
	P-value
	> 0.1
	< 0.1
	< 0.05

## Sheet: S8) Diff gene expr X BOR
Table S8: Differential gene expression by clinical response (PD vs SD+PR); cut-off at P-value > 0.05
	baseMean	log2FoldChange	lfcSE	stat	pvalue	padj
AMBP	3962.34	7.19376	1.55024	4.64043	3.48e-06	0.00266676
SSX1	88.761	-3.84839	0.862654	-4.4611	8.15e-06	0.00312701
LBP	1117.15	5.99469	1.46392	4.09496	4.22e-05	0.0107953
NLRC5	886.373	-1.60286	0.425779	-3.76453	0.000166863	0.0319959
XCL2	182.969	2.21617	0.62656	3.53705	0.000404624	0.0620693
IFIT2	545.955	-1.60298	0.4713	-3.40119	0.000670935	0.0824904
MASP1	75.4674	2.36548	0.702013	3.36957	0.000752846	0.0824904
CXCL12	922.419	2.48269	0.753493	3.29491	0.000984546	0.0943933
RAG1	71.0257	1.39114	0.439546	3.16494	0.00155115	0.132192
C3	9043.18	2.50398	0.800485	3.12808	0.00175951	0.134954
NEFL	167.07	-2.20206	0.712517	-3.09053	0.00199797	0.139313
C8B	355.132	3.962	1.30306	3.04054	0.00236155	0.150942
CT45A1	2282.04	4.48791	1.48816	3.01574	0.00256351	0.151247
CCL16	102.022	2.97266	0.996033	2.9845	0.00284045	0.155616
IL15	162.714	-1.02001	0.346679	-2.94224	0.00325843	0.166614
GZMK	136.422	1.66137	0.572876	2.90005	0.00373106	0.170385
SSX4	232.137	4.01355	1.38577	2.89625	0.00377646	0.170385
ELK1	415.475	-1.17411	0.409811	-2.865	0.0041701	0.170941
FYN	1041.2	1.12959	0.398191	2.83682	0.0045566	0.170941
SERPING1	4472.57	1.6459	0.58122	2.8318	0.0046287	0.170941
ENG	1686.5	0.866954	0.306533	2.82825	0.00468025	0.170941
FADD	425.422	-1.31962	0.470276	-2.80606	0.00501512	0.174846
HSD11B1	181.461	1.91363	0.69726	2.74451	0.00606017	0.193332
CCL14	321.017	1.97856	0.725549	2.72698	0.00639163	0.193332
IL19	79.7268	-2.59566	0.952132	-2.72615	0.00640778	0.193332
ITGAE	622.356	-0.92041	0.339752	-2.70906	0.00674737	0.193332
FN1	9667.88	2.06843	0.764328	2.70621	0.00680568	0.193332
KIR3DL1	23.0118	0.778689	0.290465	2.68084	0.00734381	0.197964
MBL2	99.3726	2.84752	1.06471	2.67446	0.00748495	0.197964
ULBP2	250.866	-1.70301	0.656254	-2.59505	0.00945783	0.241805
LYN	752.262	-0.842467	0.328889	-2.56155	0.0104205	0.257824
NOS2A	276.438	2.42277	0.97784	2.47768	0.013224	0.316964
CSF1	282.629	0.624708	0.255549	2.44458	0.0145022	0.328734
SAA1	9646.39	2.54408	1.04145	2.44284	0.0145723	0.328734
PRAME	807.933	3.42446	1.41332	2.42298	0.0153936	0.337339
CHIT1	104.895	1.66855	0.699262	2.38617	0.017025	0.362728
HLA-B	12445.9	-1.03447	0.437071	-2.36683	0.0179413	0.365816
CTSG	35.5143	1.47581	0.62453	2.36308	0.0181239	0.365816
C7	841.016	2.7645	1.17677	2.34923	0.0188125	0.368744
MASP2	89.4002	2.31447	0.988654	2.34103	0.0192305	0.368744
AKT3	1039.54	1.14302	0.493034	2.31833	0.0204311	0.382212
MAGEA3	2344.98	2.93824	1.28156	2.2927	0.0218652	0.3906
COLEC12	162.619	1.18825	0.518402	2.29213	0.021898	0.3906
GZMM	57.441	1.18745	0.52662	2.25486	0.0241421	0.413281
IL1RL2	94.5091	-1.35087	0.60054	-2.24943	0.0244853	0.413281
MAGEC2	46.3298	2.05375	0.914922	2.24472	0.0247861	0.413281
BIRC5	2276.96	-1.11251	0.504678	-2.20439	0.027497	0.445515
IL12A	52.2412	-0.992738	0.453019	-2.19138	0.0284243	0.445515
TGFB2	261.311	1.22119	0.558798	2.18538	0.0288608	0.445515
PTGDR2	69.0103	-1.51144	0.694962	-2.17485	0.0296412	0.445515
PNMA1	563.718	0.906332	0.418691	2.16468	0.030412	0.445515
ITGA5	1514.37	1.05666	0.489046	2.16066	0.0307216	0.445515
C8A	234.085	2.85964	1.32992	2.15023	0.0315372	0.445515
MYD88	2113.3	-0.50298	0.234454	-2.14532	0.0319269	0.445515
DEFB1	129.106	1.7203	0.802814	2.14283	0.0321265	0.445515
CD14	1166.73	0.756996	0.354901	2.13297	0.0329268	0.445515
C1R	4108.67	1.12102	0.526112	2.13076	0.0331087	0.445515
MAGEA12	155.719	1.96543	0.9378	2.09579	0.0361009	0.464367
TNFSF14	336.354	1.42544	0.682754	2.08777	0.0368184	0.464367
CD59	14464.7	-0.896293	0.430694	-2.08104	0.0374301	0.464367
THBS1	3612.05	1.32564	0.637341	2.07996	0.0375294	0.464367
THY1	1315.02	1.02714	0.493846	2.07988	0.0375368	0.464367
HDAC3	1286.24	-0.617113	0.300073	-2.05654	0.0397306	0.472931
HAMP	382.799	2.48416	1.21022	2.05266	0.040106	0.472931
ZNF346	220.725	-0.623644	0.304673	-2.04693	0.0406649	0.472931
TLR6	267.357	-0.724169	0.353837	-2.04662	0.0406955	0.472931
CD8B	86.8446	0.956518	0.47531	2.01241	0.044177	0.502657
CD58	1156.53	-0.627203	0.312672	-2.00595	0.0448621	0.502657
CD7	129.042	0.946586	0.474022	1.99692	0.0458336	0.502657
IL11	176.743	1.4809	0.741733	1.99654	0.0458748	0.502657
NFATC2	682.308	0.920598	0.465862	1.97612	0.0481415	0.511177
PDGFRB	2065.3	0.949408	0.482256	1.96868	0.0489897	0.511177
IL13RA2	76.6964	1.26258	0.644019	1.96047	0.0499409	0.511177

## Sheet: S9 Diff gene expr X PDL1
Table S9: Differential gene expression by PD-L1 (CPS < 1 vs ≥ 1); cut-off at P-value > 0.05
	baseMean	log2FoldChange	lfcSE	stat	pvalue	padj
LAG3	198.985	2.16864	0.480505	4.51326	6.38397e-06	0.00486459
CCL7	64.7667	2.07761	0.54349	3.82273	0.000131984	0.0405123
IDO1	384.426	2.22402	0.598725	3.71459	0.000203534	0.0405123
SPP1	9779.78	2.90409	0.784152	3.70348	0.000212663	0.0405123
GZMB	246.416	1.84183	0.537626	3.42585	0.000612867	0.093401
MAGEC2	49.0329	-2.39349	0.713052	-3.35668	0.000788838	0.100182
CCL8	282.694	2.22679	0.679247	3.27832	0.00104427	0.104955
GNLY	191.461	1.7937	0.549687	3.26313	0.00110189	0.104955
CXCL10	778.7	1.90138	0.600196	3.16793	0.00153528	0.123617
PASD1	96.2435	-2.74442	0.881855	-3.1121	0.00185764	0.123617
IL22	12.7847	-0.855251	0.27715	-3.08588	0.00202952	0.123617
IRF1	724.187	0.855604	0.278095	3.07666	0.00209333	0.123617
TAP1	1313.25	1.00907	0.328213	3.07445	0.00210895	0.123617
CD274	119.091	0.886227	0.292907	3.02563	0.00248117	0.135047
PSMB9	1830.03	0.985501	0.337589	2.91924	0.00350889	0.178251
MAGEA12	166.45	-2.10598	0.745393	-2.82532	0.00472327	0.215663
CMA1	19.2147	-1.02401	0.367475	-2.78661	0.00532629	0.215663
CD36	553.415	-1.46938	0.52795	-2.78318	0.00538284	0.215663
F13A1	1387.77	-1.64556	0.593767	-2.77138	0.00558185	0.215663
NT5E	1243.69	1.37986	0.498714	2.76683	0.00566045	0.215663
CD1E	22.3128	-1.3064	0.481945	-2.71067	0.00671466	0.243646
DDX58	857.404	0.864568	0.322398	2.68168	0.00732536	0.253724
CD207	37.8891	-1.18862	0.459035	-2.58939	0.00961474	0.309133
CTSG	37.0578	-1.28272	0.498011	-2.57569	0.010004	0.309133
IL1R1	1061.26	-0.865335	0.336582	-2.57094	0.0101422	0.309133
CCL14	315.336	-1.45699	0.570098	-2.55568	0.0105981	0.310605
IL22RA1	504.509	-1.49807	0.596757	-2.51034	0.0120614	0.340398
MAGEA3	2512.7	-2.77949	1.11955	-2.48268	0.0130398	0.354051
CTSL	1610.85	0.886297	0.361986	2.44843	0.0143479	0.354051
CLEC4C	29.8578	-0.849126	0.347724	-2.44196	0.014608	0.354051
IL23A	92.0804	0.820519	0.336858	2.4358	0.0148588	0.354051
CD1C	63.7406	-1.04186	0.429129	-2.42784	0.0151891	0.354051
CCL19	899.078	-1.80994	0.746545	-2.42442	0.0153329	0.354051
MICB	482.646	1.15139	0.477572	2.41093	0.0159119	0.356614
FCER1A	132.222	-1.4882	0.622009	-2.39256	0.0167312	0.364263
CXCL9	865.113	1.34614	0.57067	2.35888	0.0183302	0.383822
MAP3K1	1198.07	-0.873321	0.371302	-2.35205	0.0186703	0.383822
KIR_Inhibiting_Subgroup_1	20.7774	0.602664	0.257802	2.33771	0.0194026	0.383822
CD164	8611.63	-0.679494	0.291245	-2.33307	0.0196444	0.383822
GZMH	67.156	1.0183	0.438664	2.32136	0.0202676	0.386098
CX3CR1	103.406	-0.975969	0.424164	-2.30093	0.0213958	0.39765
AXL	1771.55	1.05932	0.463187	2.28702	0.0221944	0.402669
CCL21	313.619	-1.60031	0.707772	-2.26105	0.0237559	0.420977
KLRC2	76.6473	0.875722	0.39102	2.23958	0.025118	0.434998
LILRB2	287.026	0.576817	0.259703	2.22106	0.0263467	0.446138
NEG_G	9.12238	-0.713022	0.32464	-2.19635	0.028067	0.462191
MAGEC1	9.3548	-0.648011	0.295865	-2.19023	0.0285078	0.462191
PDGFC	1307.32	1.15289	0.530114	2.17481	0.0296446	0.464365
IFITM2	6296.36	0.891672	0.412762	2.16026	0.0307529	0.464365
CAMP	25.6446	-0.92366	0.427629	-2.15995	0.0307762	0.464365
LILRA4	22.7379	-0.735342	0.341059	-2.15605	0.0310795	0.464365
MAPK3	1803.47	-0.69764	0.32661	-2.136	0.0326791	0.478709
IFI35	560.139	0.813686	0.383108	2.12391	0.0336781	0.478709
MAVS	2587.09	-0.639497	0.301512	-2.12097	0.0339243	0.478709
SPA17	480.532	0.684478	0.323978	2.11273	0.0346236	0.479694
CD70	73.7289	1.13346	0.54623	2.07506	0.0379807	0.516809
FLT3	31.8476	-0.571932	0.277123	-2.06382	0.0390344	0.521828
REPS1	1811.77	-0.643492	0.317028	-2.02977	0.0423803	0.539387
PLAUR	1936.27	0.722493	0.357831	2.01909	0.0434782	0.539387
CD80	113.19	0.725656	0.359795	2.01686	0.0437102	0.539387
C7	896.169	-1.94115	0.962655	-2.01646	0.0437524	0.539387
S100B	101.732	-1.00632	0.499372	-2.01517	0.0438871	0.539387
TNFSF18	29.9508	0.796577	0.39715	2.00573	0.0448849	0.542894
ARG2	225.935	-0.932795	0.468022	-1.99306	0.0462551	0.543999
PTGDR2	45.9349	-1.08969	0.547115	-1.9917	0.0464041	0.543999
ATG7	1035.79	0.538662	0.271574	1.98348	0.0473136	0.546257
KLRK1	117.191	0.80355	0.408044	1.96927	0.0489218	0.551987
PPBP	145.769	-1.25071	0.636057	-1.96635	0.0492587	0.551987

## Sheet: S10 GSEA Cytotoxicity
Table S10: Gene set enrichment analysis result: Cytotoxicity
PROBE	RANK IN GENE LIST	RANK METRIC SCORE	RUNNING ES	CORE ENRICHMENT
GNLY	448	-0.157792	-0.476783	Yes
GZMA	463	-0.178986	-0.35329	Yes
GZMK	624	-0.386688	-0.431733	Yes
GZMH	648	-0.417541	-0.320688	Yes
GZMM	674	-0.4571	-0.212409	Yes
PRF1	692	-0.492089	-0.0930646	Yes
GZMB	693	-0.494433	0.0497926	Yes
